# Supplementary material for: A general approach for prediction of motional EPR spectra from Molecular Dynamics (MD) simulations: application to spin labelled protein
Source: Royal Society of Chemistry journal article supplement (doi:10.1039/c0cp01068e), 2011-01-01
Supplement: c0cp01068e.pdf [file c0cp01068e.pdf]

**A general approach for prediction of motional EPR spectra from  
Molecular Dynamics (MD) simulations: Application to spin labelled  
protein**

*Vasily S. Oganessian*

**Supporting Information**

### *Details of MD simulations*

The atomistic structure of myoglobin obtained from PDB databank (code PDB 1MBO) [54] has been used in the simulations. At position S58 serine has been substituted by cysteine followed by the attachment of spin label MTSL. All MD simulations have been carried out using GROMACS 3.3 software package with GROMOS96 force field parameters used to describe inter atomic interactions in the spin labelled protein [63, 64]. The partial charges on all atoms in MTSL were computed using CHELPG (Charges from Electrostatic Potentials using a Grid based) method [67] density functional theory calculations at the B3LYP/6-31G\*\* level using the Gaussian 03 program [68]. The topology of MTSL was constructed in the form of additional amino acid residue and was integrated within the topology files of 53A6. This topology is presented below. All MD simulations were carried out in a periodic cubic box of 65 Angstroms in size filled with approximately 3500 simple point charge (SPC) water molecules in the *NPT* ensemble ( $P = 1$  atm,  $T = 295$  K). The protein molecule was placed at the center of a box and one counterion  $\text{Cl}^-$  was added for charge compensation in accordance with the electrostatic potential using the *genion* tool available in GROMACS. Protonation states of the residues corresponding to  $\text{pH} = 7$  were generated by GROMACS automatically using *pdb2gmx* command. In particular, single nitrogen of the ring was protonated in histidine residues.

The initial energy minimisation was followed by a position restraint run of 0.2 ns using a molecular dynamics engine where the equations of motion were integrated with the third order leap-frog algorithm [69] having a time step of 2 fs. All bond lengths were constrained using the LINCS (Linear Constraint Solver) algorithm which allowed the use of a time step of 2 fs [70]. In order to optimize the computing time, a grid neighbour searching algorithm with a cut-off radius of 1.0 nm and cubic periodic

boundary conditions were employed to generate a pair list of neighbouring atoms for the non-bonded interactions and updated every 10 steps. The short-ranged van der Waals interactions were truncated using a cut-off of 1.4 nm, while long range electrostatic interactions were handled by a particle-mesh Ewald algorithm [70, 71] with a Coulomb cut-off radius of 1.0 nm. Two Berendsen's temperature couplings to baths at 295 K and relaxation times of 0.1 ps were used for both the solute and solvent [72]. Weak coupling to Berendsen thermostat with velocity scaling to maintain constant temperature is widely used in the bio-molecular MD simulation studies including spin labelled proteins and other bio-molecules [9, 29, 52, 73-74]. A Berendsen's pressure coupling was used to scale the box, using a relaxation time of 0.5 ps [70, 72]. After initial equilibration runs the molecular dynamics production runs were carried out for 40 ns using standard 2 fs time step again with LINCS algorithm. The non-bonded interactions were treated in the same way as in the position restraint run. The production MD trajectories were used for EPR spectra simulations and analysis.

On average it takes approximately up to 3 weeks to complete an MD run.

Three MD simulations have been performed corresponding to three initial conformations of five dihedral angles of the MTSL tether, namely, configuration "1" - (dihedrals : 1 =  $+60^{\circ}$ ; 2 =  $+60^{\circ}$ ; 3 =  $+90^{\circ}$ ; 4 =  $+60^{\circ}$ ; 5 =  $-90^{\circ}$ ), configuration "2" - (dihedrals : 1 =  $180^{\circ}$ ; 2 =  $+60^{\circ}$ ; 3 =  $+90^{\circ}$ ; 4 =  $180^{\circ}$ ; 5 =  $-90^{\circ}$ ) and configuration "3" (dihedrals : 1 =  $180^{\circ}$ ; 2 =  $180^{\circ}$ ; 3 =  $-90^{\circ}$ ; 4 =  $-60^{\circ}$ ; 5 =  $-90^{\circ}$ ).

Typical plot indicating the variation of both RMSD of the spin labelled protein and its total energy during the production run is presented:

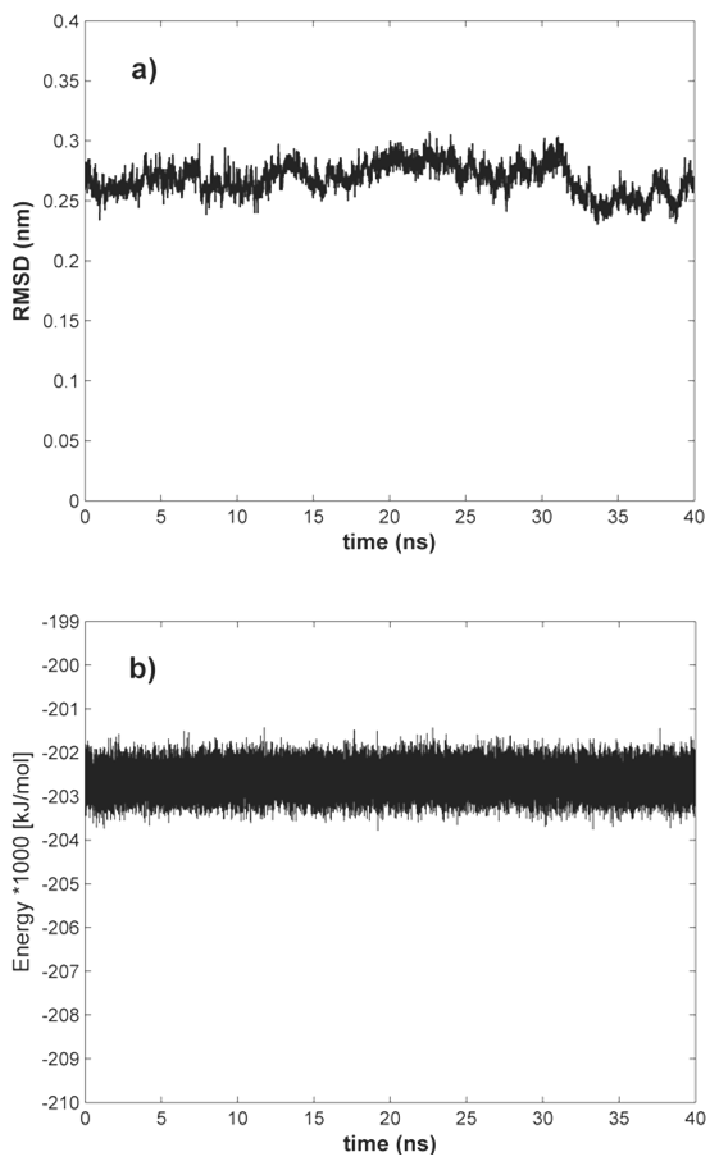

**Figure S1.** Variation of the RMSD (a) and the total energy (b) of spin labelled Mb during the 40 ns of the production run using the first starting conformation.

**Topology for MTSL:**

[ MTSL ]

[ atoms ]

|    |     |          |   |
|----|-----|----------|---|
| N  | N   | -0.28000 | 0 |
| H  | H   | 0.28000  | 0 |
| CA | CH1 | 0.12460  | 1 |

|     |     |          |   |
|-----|-----|----------|---|
| CB  | CH2 | 0.06025  | 1 |
| SC  | S   | -0.15843 | 2 |
| SD  | S   | -0.12367 | 2 |
| C5  | CH2 | 0.14559  | 2 |
| C6  | C   | -0.09550 | 3 |
| C10 | CR1 | -0.21552 | 3 |
| C12 | CH3 | -0.11756 | 4 |
| C13 | CH3 | -0.08780 | 5 |
| C8  | CH3 | -0.07445 | 6 |
| C9  | CH3 | -0.11756 | 7 |
| C7  | C   | 0.52097  | 8 |
| N14 | NR  | 0.02155  | 8 |
| O15 | O   | -0.40897 | 8 |
| C11 | C   | 0.52650  | 8 |
| C   | C   | 0.380    | 9 |
| O   | O   | -0.380   | 9 |

[ bonds ]

|     |     |       |
|-----|-----|-------|
| N   | H   | gb_2  |
| N   | CA  | gb_20 |
| CA  | C   | gb_26 |
| C   | O   | gb_4  |
| C   | +N  | gb_9  |
| CA  | CB  | gb_26 |
| CB  | SC  | gb_30 |
| SC  | SD  | gb_33 |
| SD  | C5  | gb_30 |
| C5  | C6  | gb_22 |
| C6  | C7  | gb_24 |
| C6  | C10 | gb_6  |
| C7  | C8  | gb_25 |
| C7  | C9  | gb_25 |
| C7  | N14 | gb_21 |
| C10 | C11 | gb_24 |
| C11 | C12 | gb_25 |
| C11 | C13 | gb_25 |
| C11 | N14 | gb_21 |
| N14 | O15 | gb_5  |

[ exclusions ]

|     |     |
|-----|-----|
| C5  | C8  |
| C5  | C9  |
| C5  | C11 |
| C5  | N14 |
| C6  | O15 |
| C6  | C12 |
| C6  | C13 |
| C7  | C12 |
| C7  | C13 |
| C8  | C10 |
| C8  | C11 |
| C8  | O15 |
| C9  | C10 |
| C9  | C11 |
| C9  | O15 |
| C10 | O15 |
| C12 | O15 |
| C13 | O15 |

[ angles ]

; ai aj ak gromos type

```

-C      N      H      ga_31
  H      N      CA     ga_17
-C      N      CA     ga_30
  N      CA      C      ga_12
  CA     C      +N     ga_18
  CA     C      O      ga_29
  O      C      +N     ga_32
  N      CA     CB     ga_12
  C      CA     CB     ga_12
  CA     CB     SC     ga_15
  CB     SC     SD     ga_5
  SC     SD     C5     ga_5
  SD     C5     C6     ga_15
  C5     C6     C7     ga_30
  C5     C6     C10    ga_34
  C6     C10    C11    ga_15
  C6     C7     C8     ga_15
  C6     C7     C9     ga_15
  C6     C7     N14    ga_2
  C7     N14    O15    ga_30
  C7     N14    C11    ga_18
  C7     C6     C10    ga_15
  C8     C7     N14    ga_12
  C8     C7     C9     ga_14
  C9     C7     N14    ga_12
  C10    C11    C12    ga_15
  C10    C11    C13    ga_15
  C10    C11    N14    ga_2
  C11    N14    O15    ga_30
  C12    C11    N14    ga_12
  C13    C11    N14    ga_12
  C13    C11    C12    ga_12
    
```

[ impropers ]

```

; ai  aj  ak  al  gromos  type
  N   -C  CA   H   gi_1
  C   CA  +N   O   gi_1
  CA  N   C   CB   gi_2
  N14 C7  C11  O15  gi_1
  N14 C7  C6   C10  gi_1
  C7  C6  C10  C11  gi_1
  C6  C10 C11  N14  gi_1
  C10 C11 N14  C7   gi_1
  C11 N14 C7   C6   gi_1
  C6  C7  C10  C5   gi_1
    
```

[ dihedrals ]

```

; ai  aj  ak  al  gromos  type
-C   -C  N   CA   gd_4
-C   N   CA  C   gd_19
  N   CA  C   +N   gd_20
  N   CA  CB  SC   gd_17
  CA  CB  SC  SD   gd_13
  CB  SC  SD  C5   gd_10
  SC  SD  C5  C6   gd_13
  SD  C5  C6  C10  gd_22
    
```

### *Extension of the working length of the MD trajectory*

The working length of MD trajectory can in principle be increased by appending the generated short trajectory several times [44]. However, the periodic nature of the resulting overall trajectory would inevitably introduce oscillations in the correlation functions. A different approach can be adapted taking the advantage of the fact that classical equations of motion are reversible in time. In this respect time is used as an extra “degree of freedom” to provide additional trajectory. Thus, one can effectively at least double the length of the working trajectory:  $T_1 = [T; -T]$ . This rule can be repeated to the new trajectory  $T_2 = [T_1; -T_1] = [T; -T; -T; T]$  and so on until the desired length of the trajectory is achieved. We argue that this approach provides a more accurate representation of the dynamical trajectory compared with the truncated or appended trajectories. Extending the working length of both BD and MD trajectories using time inversion has demonstrated that the shapes of autocorrelation functions at longer times are much improved. At the same time it is important to emphasise that in principle this method can improve the quality of the correlation curves at longer times only because of generating additional transition between the states using the information contained in the initial trajectory. It is, however, able neither to model nor to enhance the sampling of the stochastic dynamics of the spin. It is designed to improve the quality of correlation functions within the limits of the sampling provided by the original trajectory. For instance, in the case of insufficient number of transitions in the trajectory extending of the trajectory would still result in a poor sampling of the dynamics of the molecule and inadequate simulation of EPR spectra. The following condition should also be satisfied for the length of truncated trajectory  $\tilde{T} > \tau_c$ , where  $\tau_c$  is the slowest correlation time from the dynamical contributions to the overall motion. In all our MD simulations of spin labelled Mb at the 58 site of

attachment in water solution 40 ns trajectories have sufficient number of dihedral transitions and, therefore, were suitable for extension.

**Additional References:**

- [67] C. M. Breneman and K. B. Wiberg, *J. Comput. Chem.* 1990, 11, 361.
- [68] M. J. Frisch, et al., GAUSSIAN 03 (Revision E.01), Gaussian, Inc., Wallingford, CT, 2004.
- [69] R.W. Hockney, S.P. Goel, J. Eastwood, *J. Comp. Phys.*, 1974, 14, 148.
- [70] B. Hess, H. Bekker, H.J. C. Berendsen and J.G.E.M. Fraaije, *J. Comp. Chem.*, 1997, 18, 1463.
- [70] T. Darden, D. York, and L. Pedersen, *J. Chem. Phys.*, 1993, 98, 10089.
- [71] U. Essmann, L. Perera, M. L. Berkowitz, T.Darden, H. Lee and L. G. Pedersen, *J. Chem. Phys.*, 1995, 103, 8577.
- [72] H.J.C. Berendsen, J.P.M. Postma, A. DiNola and J.R. Haak, *J. Chem. Phys.*, 1984, 81, 3684.
- [73] M. Bortolus, F. Tombolato, I. Tessari, M. Bisaglia, S. Mammi, L. Bubacco, A. Ferrarini, and A.L. Maniero, *J. Am. Chem. Soc.*, 2008, 130, 21, 6690.
- [74] S. Pistolesi, E. Ferro, A. Santucci, R. Basosi, L. Trabalzini and R. Pogni, *Biophys. Chem.*, 2006, 123, 1, 49.



**Additional Figures:**

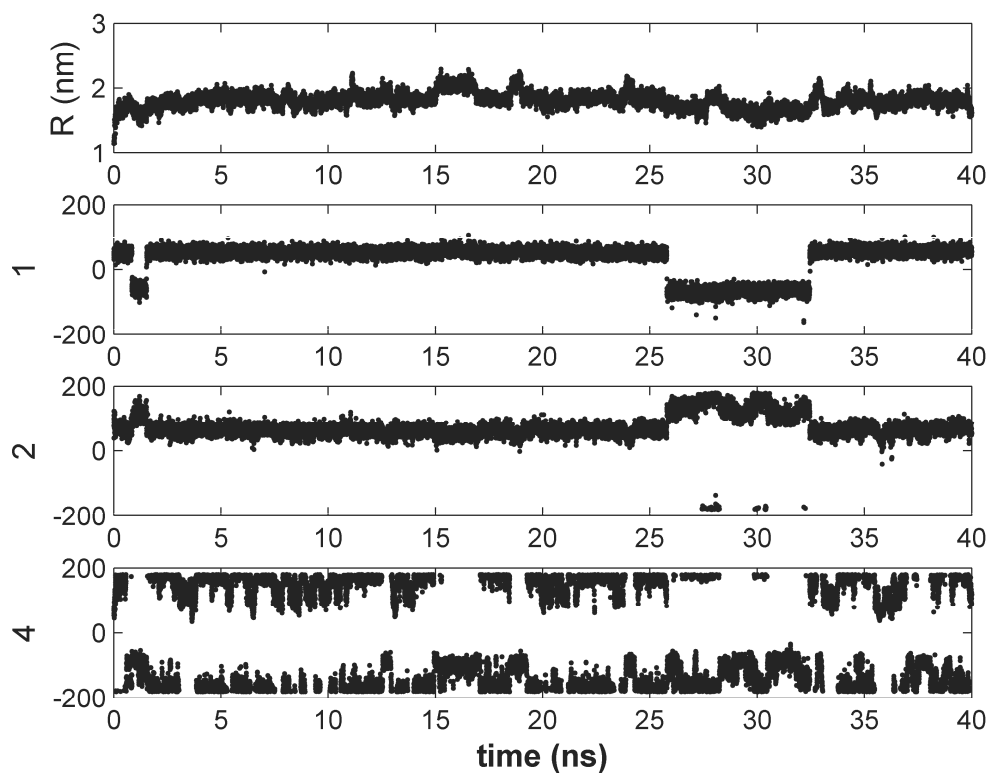

**Figure S2.** Time evolution of the distance between the nitroxide  $^{14}\text{N}$  and the heme Fe (top sub-plot) and three dihedral angles 1, 2, 4 of the side chain of MTSL, respectively. The initial configuration is “2”.

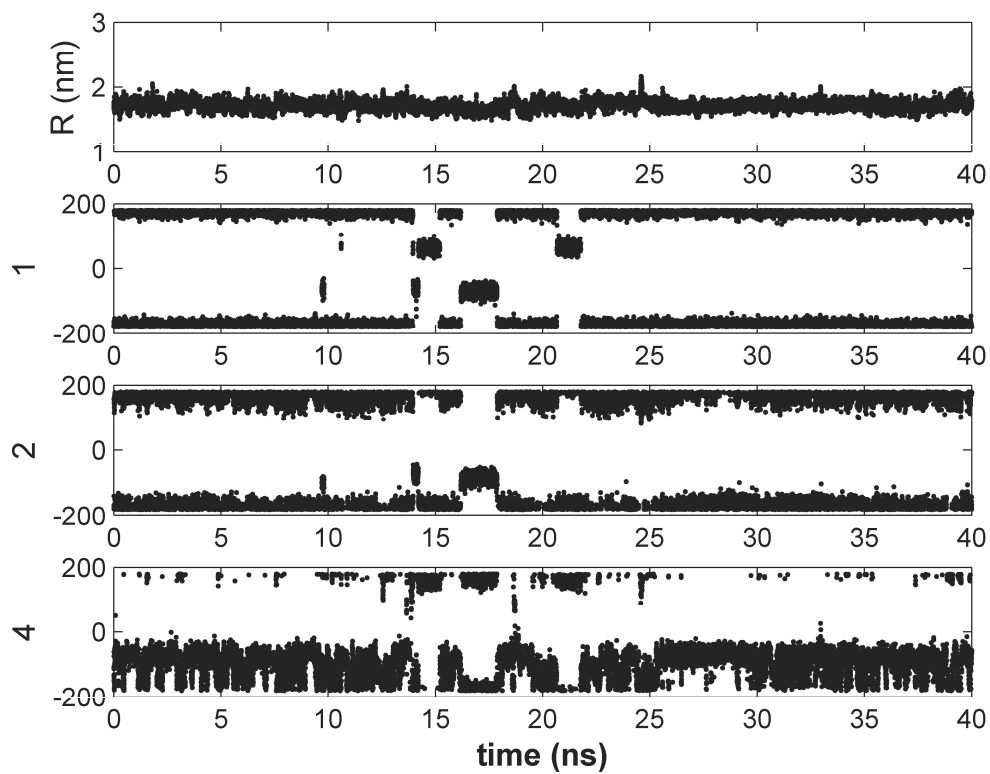

**Figure S3.** Time evolution of the distance between the nitroxide  $^{14}\text{N}$  and the heme Fe (top sub-plot) and three dihedral angles 1, 2, 4 of the side chain of MTSL, respectively. The initial configuration is “3”.
